# Supplementary material for: Binding uric acid: a pure chemical solution for the treatment of hyperuricemia
Source: Royal Society of Chemistry journal article supplement (doi:10.1039/d4ra04626a), 2024-01-01
Supplement: d4ra04626a1.pdf [file d4ra04626a1.pdf]

## Supporting Information

### Binding Uric Acid: A Pure Chemical Solution for the Treatment of Hyperuricemia

Yun-Yun Li,<sup>a†</sup> Jing Li,<sup>b†</sup> Yan Li,<sup>a</sup> Hong-Ping Long,<sup>c</sup> Wei Lin,<sup>d</sup> Yi-Kun Wang,<sup>a</sup> Rong Tang,<sup>e</sup> Xue-Wu Liu,<sup>f</sup> Dejian Jiang,<sup>f</sup> Shao Liu,<sup>b</sup> Dongsheng Cao,<sup>a</sup> Gui-Shan Tan,<sup>b</sup> Kang-Ping Xu,<sup>a</sup> Wen-Xuan Wang<sup>a,f,\*</sup>

<sup>a</sup>*Xiangya School of Pharmaceutical Sciences, Central South University, Changsha, Hunan 410008, PR China.*

<sup>b</sup>*Department of Pharmacy, National Clinical Research Center for Geriatric Disorder, Xiangya Hospital, Central South University, Changsha, Hunan 410008, PR China.*

<sup>c</sup>*The First Hospital of Hunan University of Chinese Medicine, Changsha, Hunan 410007, PR China.*

<sup>d</sup>*Department of Pathology, Xiangya Hospital, Central South University, Changsha, Hunan 410008, PR China.*

<sup>e</sup>*Department of Nephrology, Xiangya Hospital, Central South University, Changsha, Hunan 410008, PR China.*

<sup>f</sup>*Hunan Prima Drug Research Center Co., Ltd, Hunan Research Center for Drug Safety Evaluation, Hunan Key Laboratory of Pharmacodynamics and Safety Evaluation of New Drugs, Changsha, Hunan 410331, PR China.*

<sup>†</sup>These authors contributed equally to this work

#### \*Corresponding Authors

Email: wenxuanwang@tom.com

#### Contents

|                                                                                                                                                                                                                                                                 |    |
|-----------------------------------------------------------------------------------------------------------------------------------------------------------------------------------------------------------------------------------------------------------------|----|
| 1. <b>Figure S1.</b> HPLC analysis for compound <b>1b</b> (purity $\geq 95.1\%$ )                                                                                                                                                                               | S2 |
| 2. <b>Figure S2.</b> <sup>1</sup> H NMR spectrum of compound <b>1a</b> (500 MHz, chloroform- <i>d</i> )                                                                                                                                                         | S3 |
| 3. <b>Figure S3.</b> <sup>13</sup> C NMR spectrum of compound <b>1a</b> (150 MHz, DMSO- <i>d</i> <sub>6</sub> )                                                                                                                                                 | S3 |
| 4. <b>Figure S4.</b> <sup>1</sup> H NMR spectrum of compound <b>1b</b> (600 MHz, methanol- <i>d</i> <sub>4</sub> )                                                                                                                                              | S4 |
| 5. <b>Figure S5.</b> <sup>13</sup> C NMR spectrum of compound <b>1b</b> (150 MHz, chloroform- <i>d</i> )                                                                                                                                                        | S4 |
| 6. <b>Figure S6.</b> pH-V titration curve of compound <b>1a</b>                                                                                                                                                                                                 | S5 |
| 7. <b>Figure S7.</b> NOESY of a 1:1 mixture of compound <b>1a</b> and uric acid (600 MHz, DMSO- <i>d</i> <sub>6</sub> )                                                                                                                                         | S5 |
| 8. <b>Table S1.</b> The amount, the percentage of the total administered dose, or concentration of compounds <b>1a/1b</b> in feces, urine and plasma 10.5 hours after the oral administration of compound <b>1b</b> (approximately 500 mg/kg, 80 mg per mouse). | S6 |

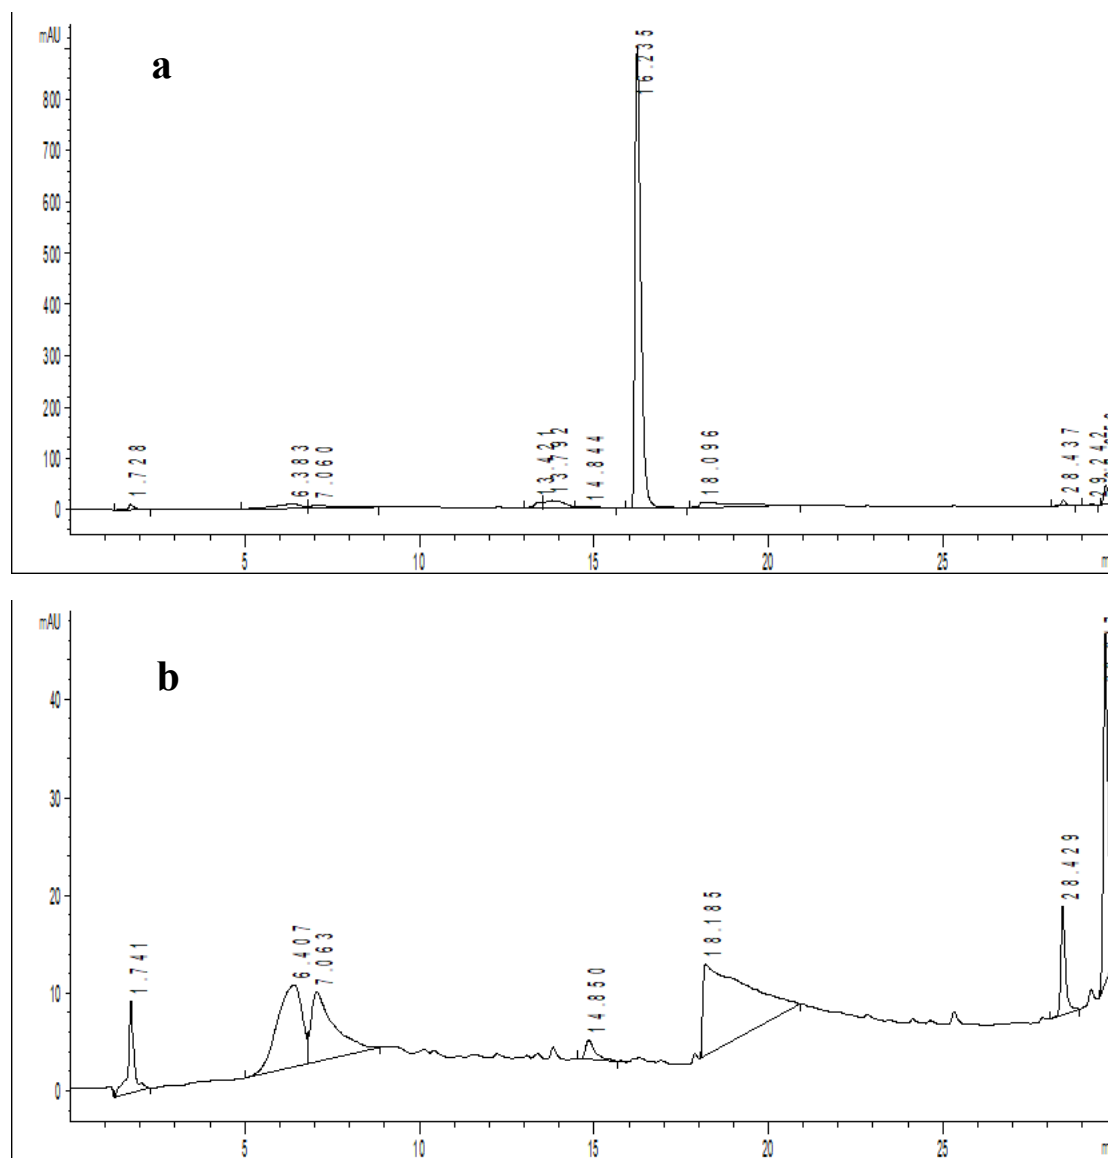

**Figure S1.** HPLC analysis for compound **1b** (purity  $\geq 95.1\%$ ). **a**) HPLC chromatography of compound **1b**. **b**) HPLC chromatography of blank solvent. HPLC conditions: ZORBAX SB-C18,  $5\ \mu\text{m}$  ( $4.6 \times 250\ \text{mm}$ ), 5%–95% methanol (added with 1% acetic acid), 30 min, flow rate 1 mL/min; UV detection 254 nm; injection volume,  $20\ \mu\text{L}$ ; retention time, 16.24 min.

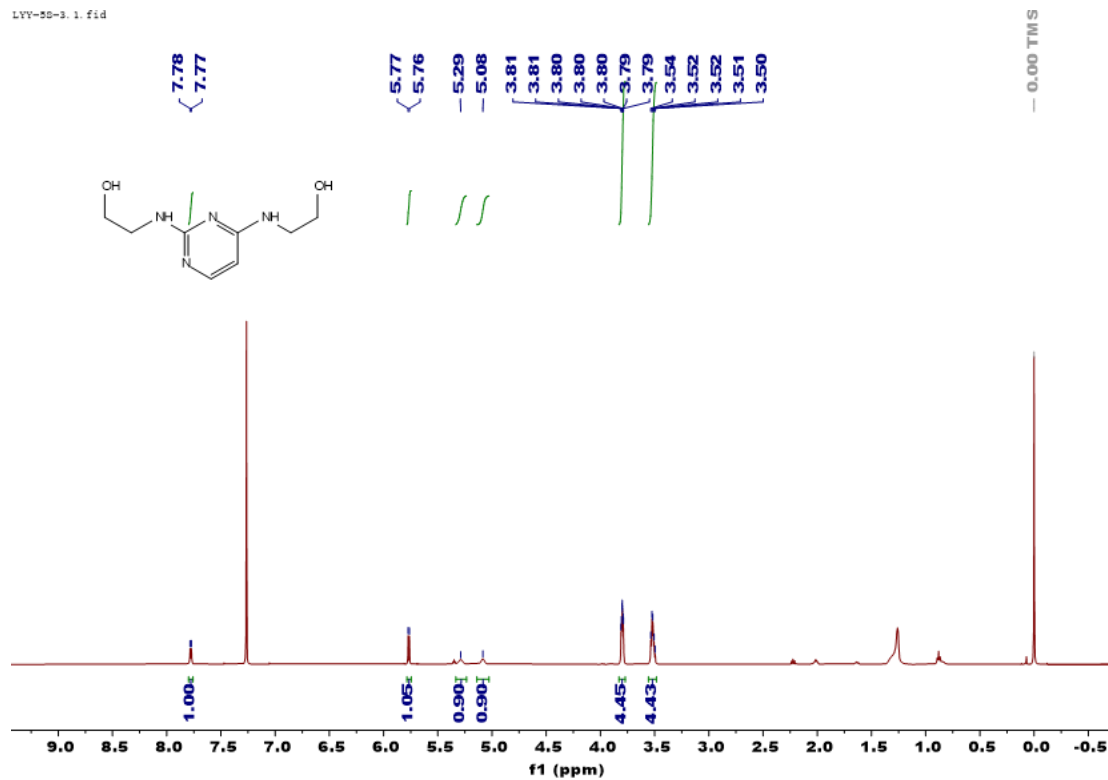

**Figure S2.**  $^1\text{H}$  NMR spectrum of compound **1a** (500 MHz, chloroform- $d_3$ ).

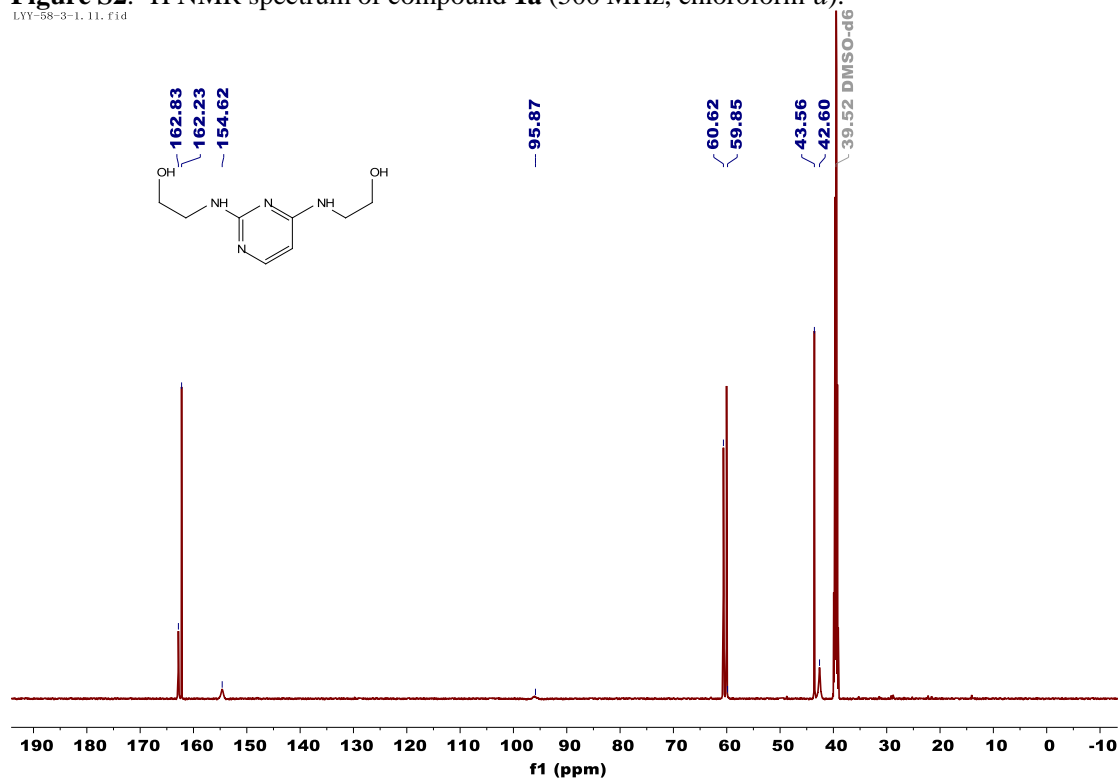

**Figure S3.**  $^{13}\text{C}$  NMR spectrum of compound **1a** (150 MHz, DMSO- $d_6$ ).

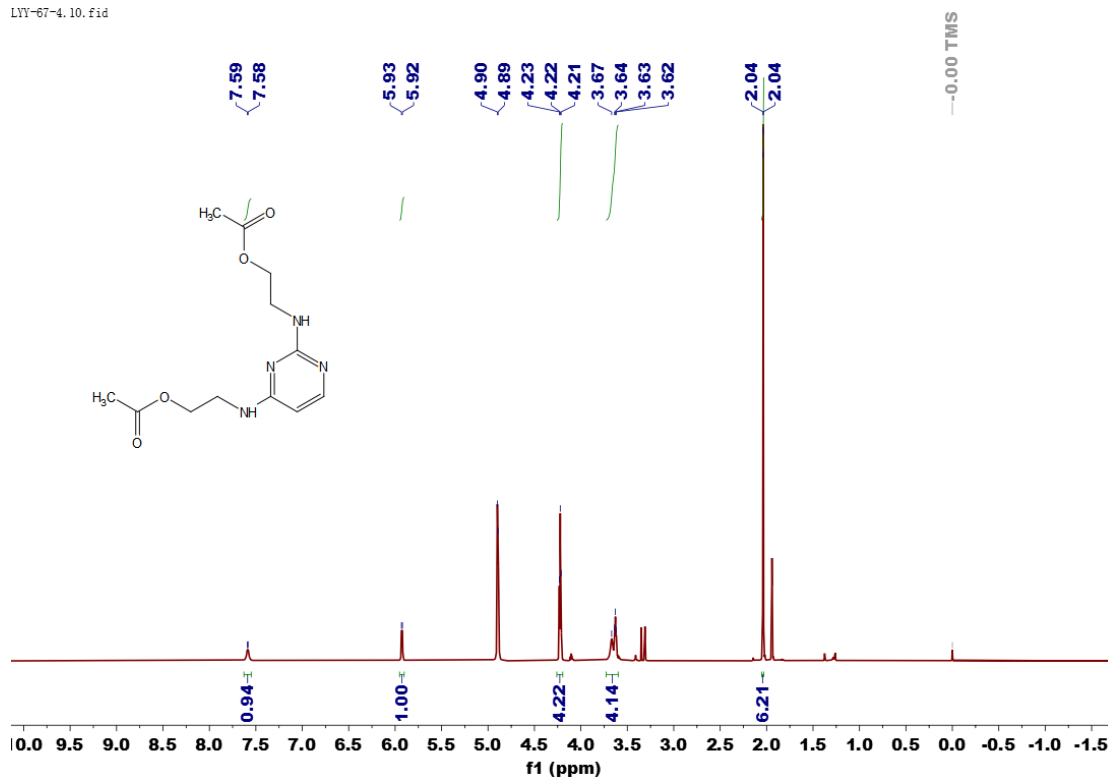

**Figure S4.**  $^1\text{H}$  NMR spectrum of compound **1b** (600 MHz, methanol- $d_4$ ).

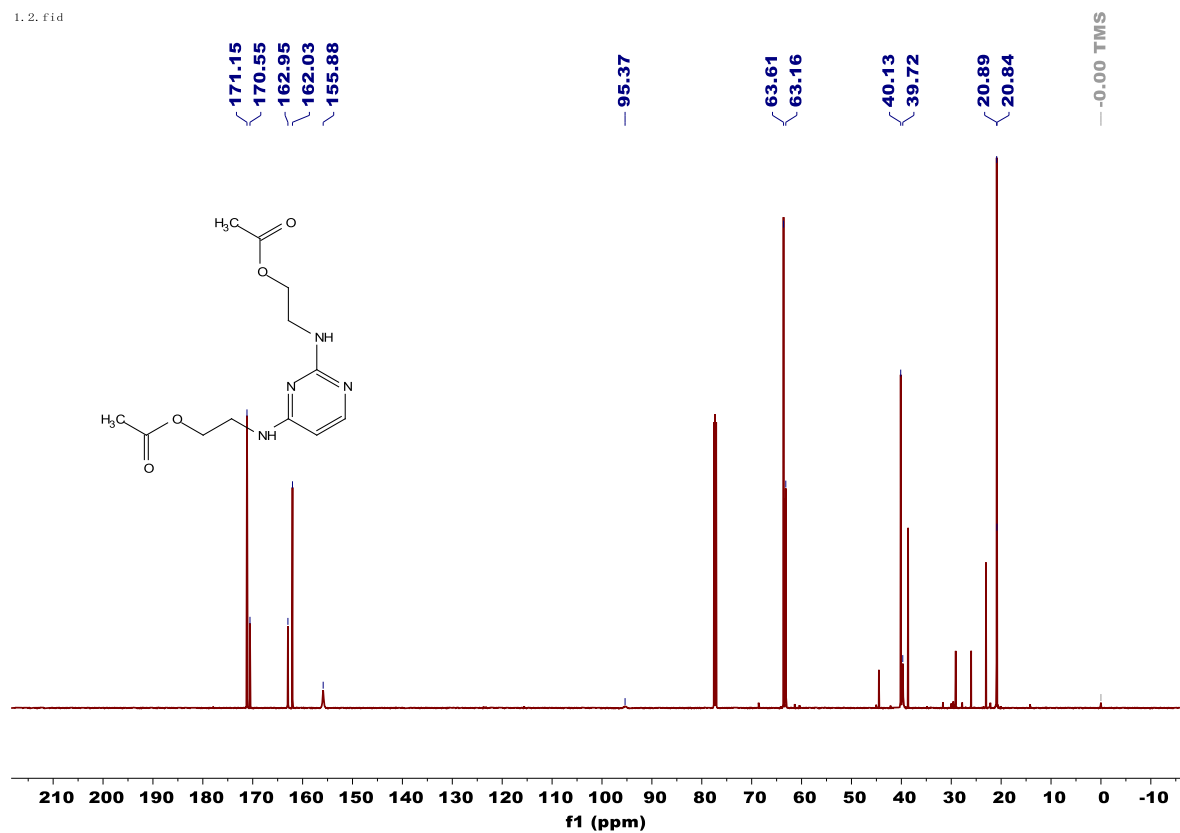

**Figure S5.**  $^{13}\text{C}$  NMR spectrum of compound **1b** (150 MHz, chloroform- $d$ ).

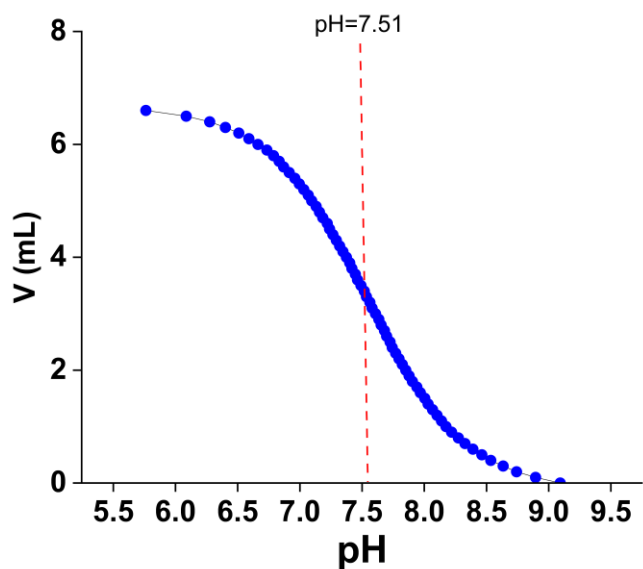

Figure S6. pH-V titration curve of compound 1a

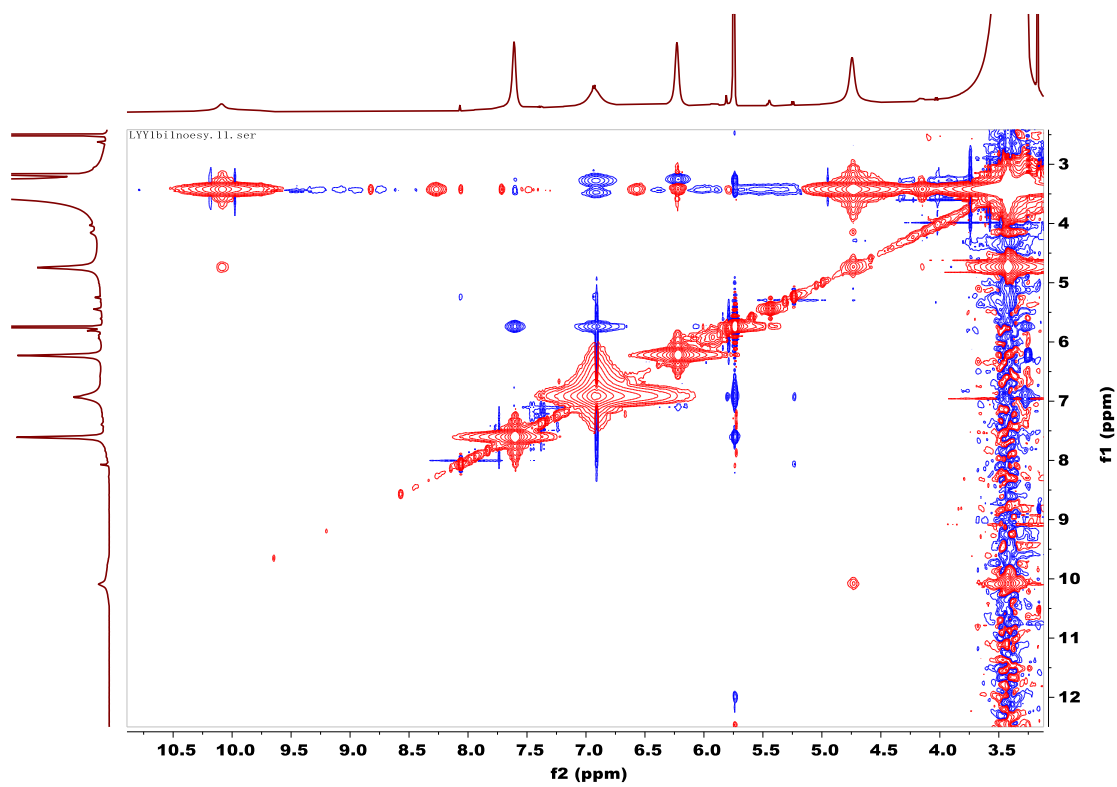

Figure 7S. NOESY of a 1:1 mixture of compound 1a and uric acid (600 MHz, DMSO-*d*<sub>6</sub>).

**Table 1S.** The amount, the percentage of the total administered dose, or concentration of compounds **1a/1b** in feces, urine and plasma 10.5 hours after the oral administration of compound **1b** (approximately 500 mg/kg, 80 mg per mouse).

|                                | <b>1a</b>        | <b>1b</b>     |
|--------------------------------|------------------|---------------|
| In urine (mg) / percentage (%) | 23.7±3.5 / 42.3% | n. d. / n. d. |
| In feces (mg) / percentage (%) | 1.4±0.7 / 2.5%   | n. d. / n. d. |
| In plasma (mg/mL)              | n. d.            | n. d.         |

n. d. not detected.

In this experiment, 4 male Kunming mice aged 8 weeks (40±0.5 g) were used. After one week of environmental adaptation, the mice were intubated with compound **1b** (80 mg, dissolved in 0.3 mL 0.9% saline containing 0.5% CMC-Na). The mice were then placed in metabolic cages, respectively, to collect urine and feces over a period of 10.5 hours. Then, blood sample was collected from the orbital sinus of each mouse and stored in tubes with 1 mg/mL EDTA, and centrifugated at 3000 rpm for 10 minutes at 4 °C to yield the plasma. All collected urine and feces (ground in a mortar) were separately placed into 25 mL volumetric flasks, and diluted or extracted by 25 mL methanol. After 24 h, the supernatant in each flask was then centrifuged (10 min, 3000 rpm), diluted 50 times, and analyzed using HPLC (column: Supersil ODS2, 3 μm, 2.1 mm × 150 mm; 0~25 min, 5% to 100% acetonitrile in water, 254 nm, 0.2 mL/min). 100 μL plasma sample of each mouse was added with 900 μL methanol. After 24 h, they were centrifuged and analyzed with method mentioned above. The concentration of compound **1a/1b** in samples was calculated based on their peak area and the standard curve obtained by standard samples.
